# Supplementary material
Source: MDPI journal article supplement (https://www.mdpi.com/2073-445X/9/1/27)
Supplement: s1 [file s1]

# Supplementary Materials: Mapping Land Cover Change Over a 25-year Period (1993-2018) in Sri Lanka Using Landsat Time-Series

Chithrangani WM Rathnayake \*, Simon Jones and Mariela Soto-Berelov

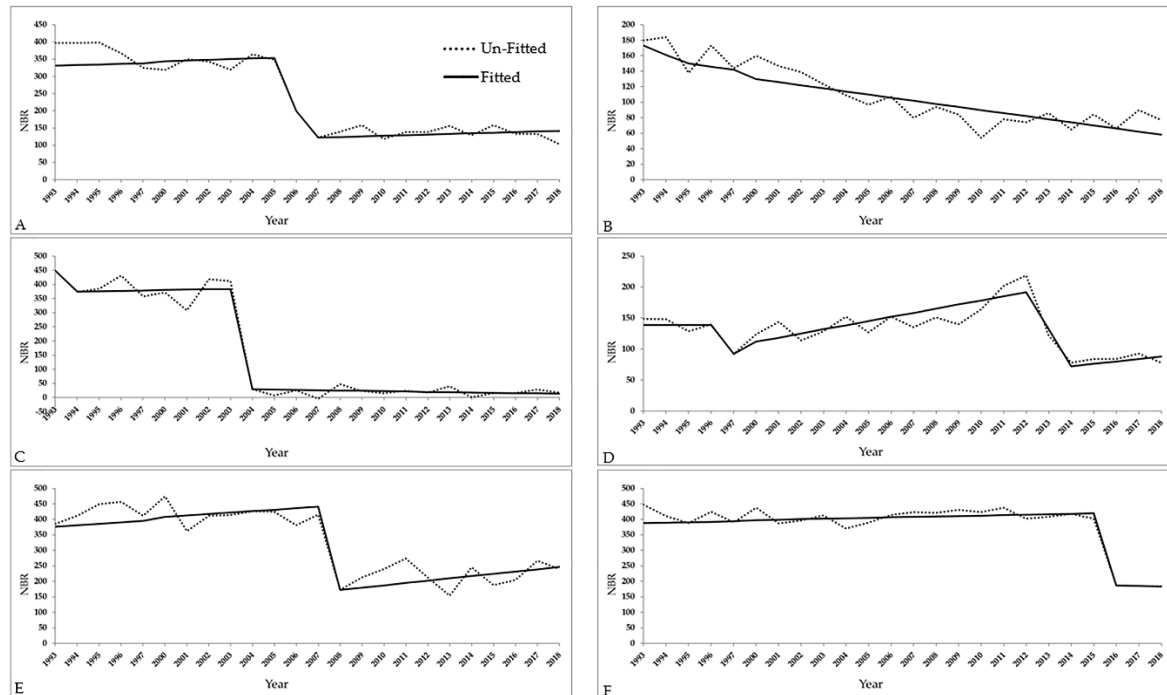

**Figure S1.** Examples of temporal change trajectories: **A:** Plantation changed to urban, **B:** Home garden changed to peri-urban and subsequently to urban, **C:** Forest changed to water, **D:** Peri-urban changed to urban, **E:** Rice paddy changed to water, **F:** Forest changed to urban.

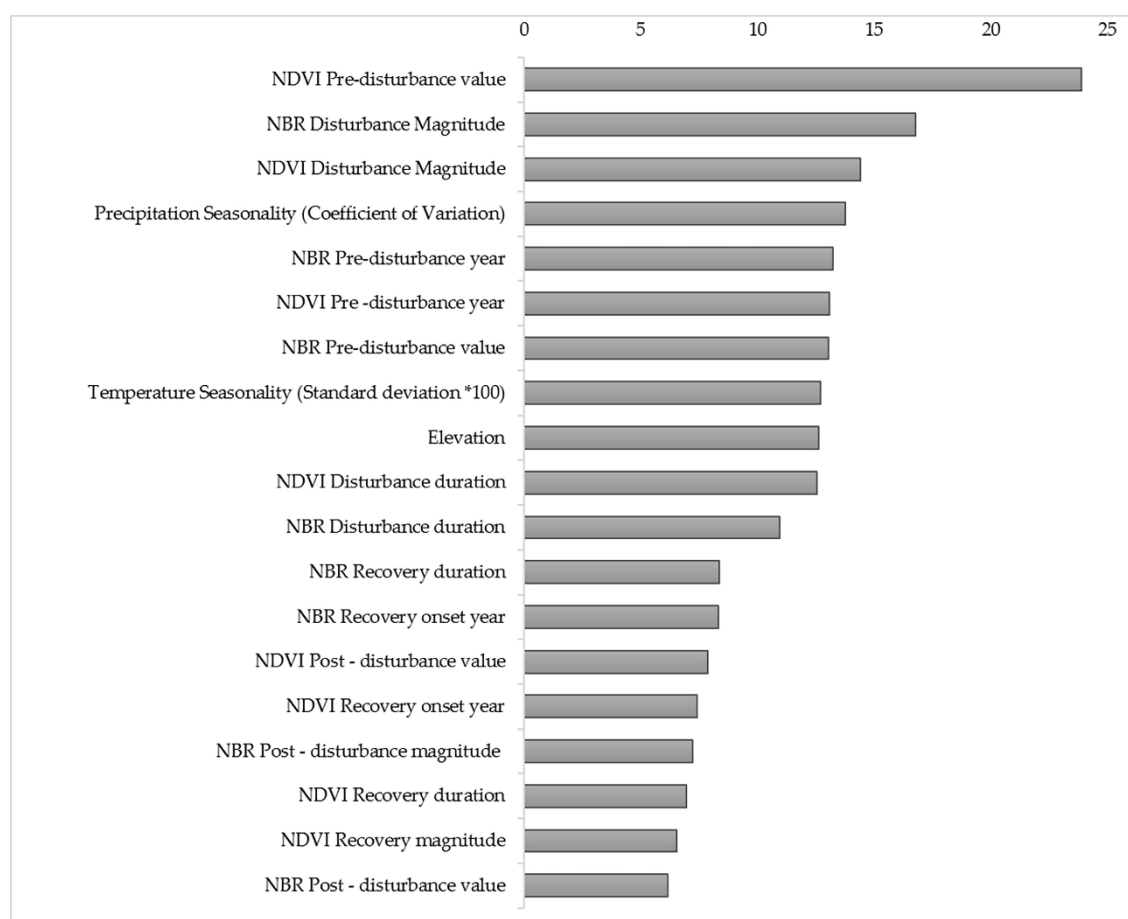

**Figure S2.** Variable importance graph prepared based on mean decrease accuracy of the random forest model.
